# Supplementary material for: Decreased Microvascular Function in Tanzanian Children With Severe and Uncomplicated Falciparum Malaria
Source: PubMed Central journal article supplement — Open Forum Infect Dis. 2017 Apr 22;4(2):ofx079. doi: 10.1093/ofid/ofx079 (PMC5569702; doi:10.1093/ofid/ofx079), 2017-04-22

## Supplementary Figure

### Legends

Figure 1A. Skeletal muscle reoxygenation rate (defined as the rate of increase in  $\text{StO}_2$  per second after release of ischemic stress) in healthy children, children with uncomplicated malaria, and children with cerebral malaria ( $P < 0.001$  by analysis of variance)

Figure 1B. Difference between peak and baseline  $\text{StO}_2$  (defined as peak  $\text{StO}_2$  recorded after release of the ischemic stress minus the  $\text{StO}_2$  recorded at baseline) in healthy children, children with uncomplicated malaria, and children with cerebral malaria ( $P < 0.001$  by analysis of variance)

Figure 1C. Skeletal muscle oxygen consumption rate in healthy children, children with uncomplicated malaria, and children with cerebral malaria ( $P = 0.058$  by analysis of variance)

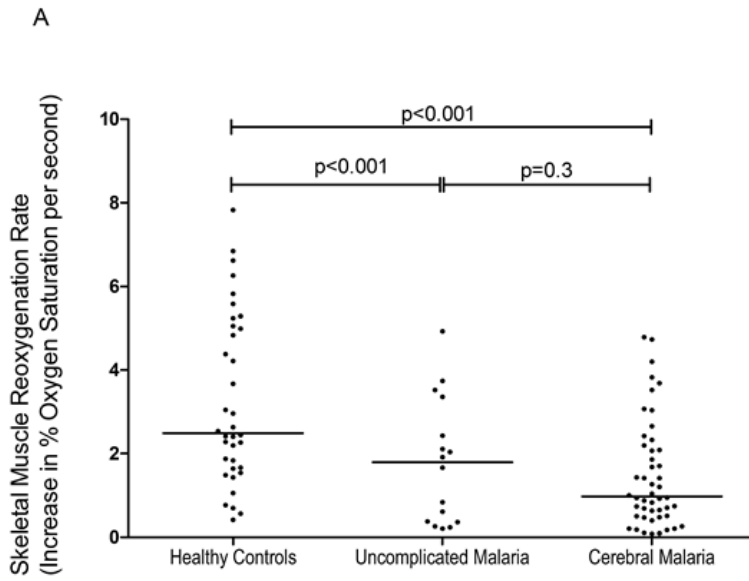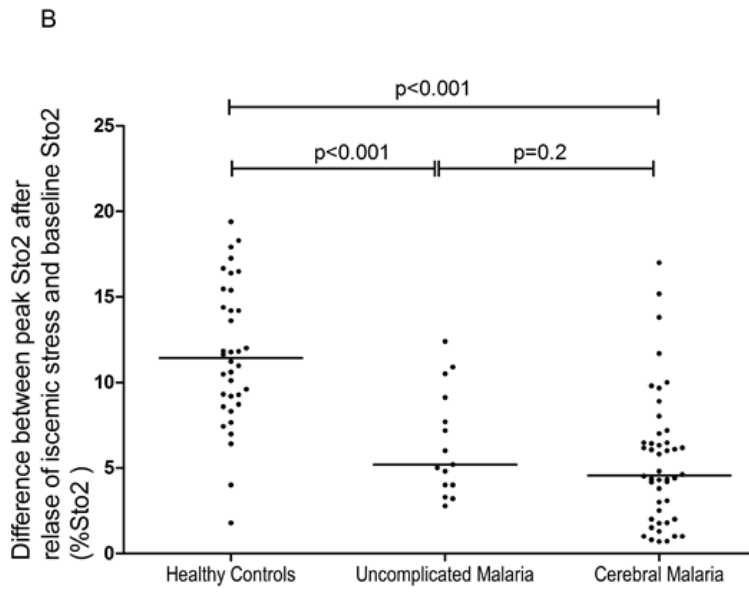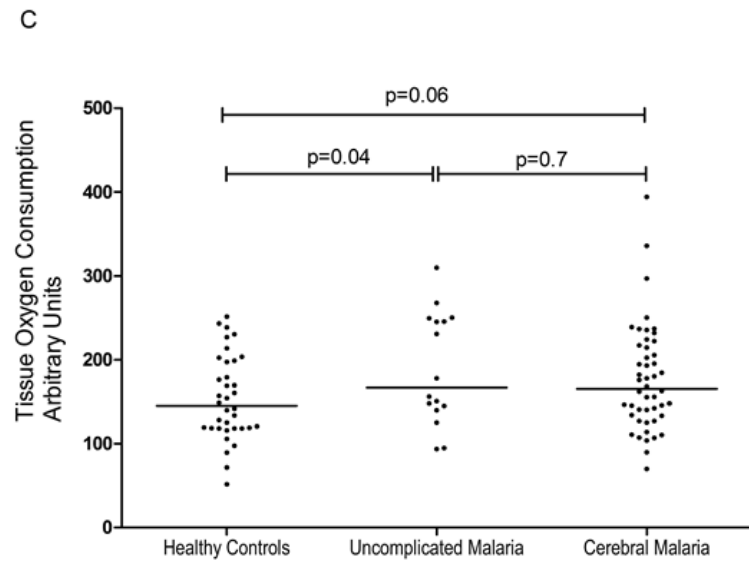

Supplement: ofx079_suppl_1700070-supplemental-data-figure.pdf [file ofx079_suppl_1700070-supplemental-data-figure.pdf]
